# Supplementary material
Source: MDPI journal article supplement (https://www.mdpi.com/2073-4352/13/8/1202)
Supplement: s1 [file s1]

## **Supplementary information**

### **Features of the phase formation of Cr/Mn/Fe/Co/Ni/Cu codoped bismuth niobate pyrochlore**

N.A. Zhuk<sup>1</sup>, B.A. Makeev<sup>2</sup>, M. G. Krzhizhanovskaya<sup>3</sup>, S.V. Nekipelov<sup>4</sup>, D.V. Sivkov<sup>4</sup>

<sup>1</sup>\*Syktyvkar State University, Oktyabrsky prospect, 55, Syktyvkar, 167001, Russia

<sup>2</sup>Institute of Geology of the Komi Science Center UB RAS, Pervomaiskaya st. 48, Syktyvkar, 167982, Russia

<sup>3</sup>Saint Petersburg State University, University Emb. 7/9, 199034, St. Petersburg, Russia

<sup>4</sup>Institute of Physics and Mathematics of the Komi Science Center UB RAS, Opleznina st. 4, Syktyvkar, Republic of Komi, 167982, Russia

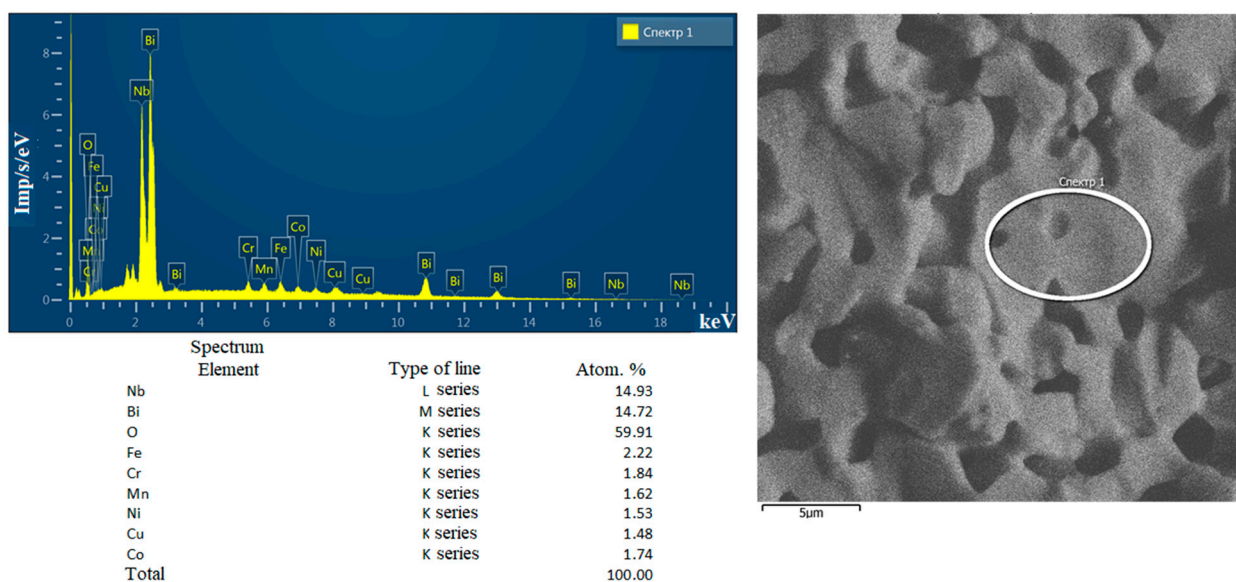

**Fig. S1** Microphotograph and EDS analysis of the  $\text{Bi}_2\text{Cr}_{1/6}\text{Mn}_{1/6}\text{Fe}_{1/6}\text{Co}_{1/6}\text{Ni}_{1/6}\text{Cu}_{1/6}\text{Nb}_2\text{O}_{9+\Delta}$  sample, calcined at 1050 °C.

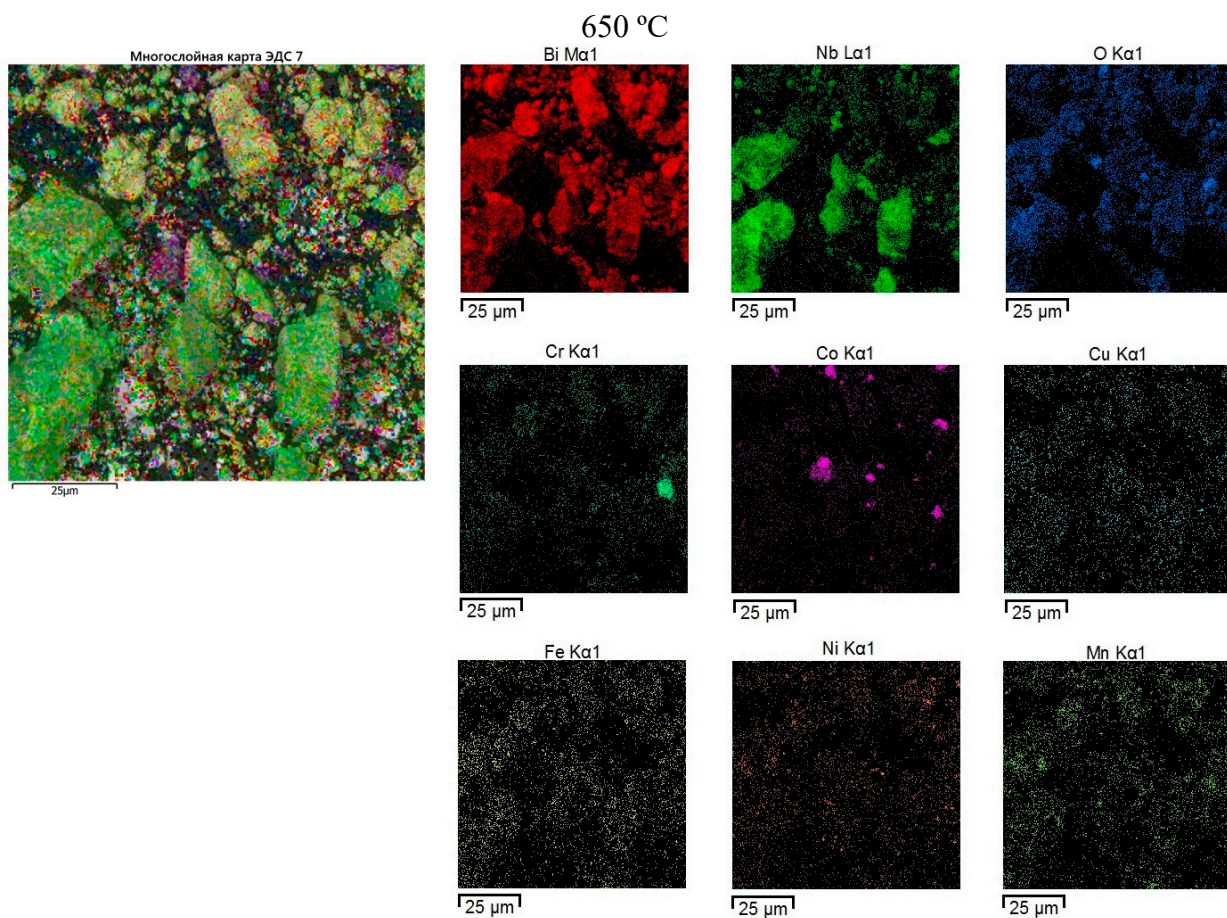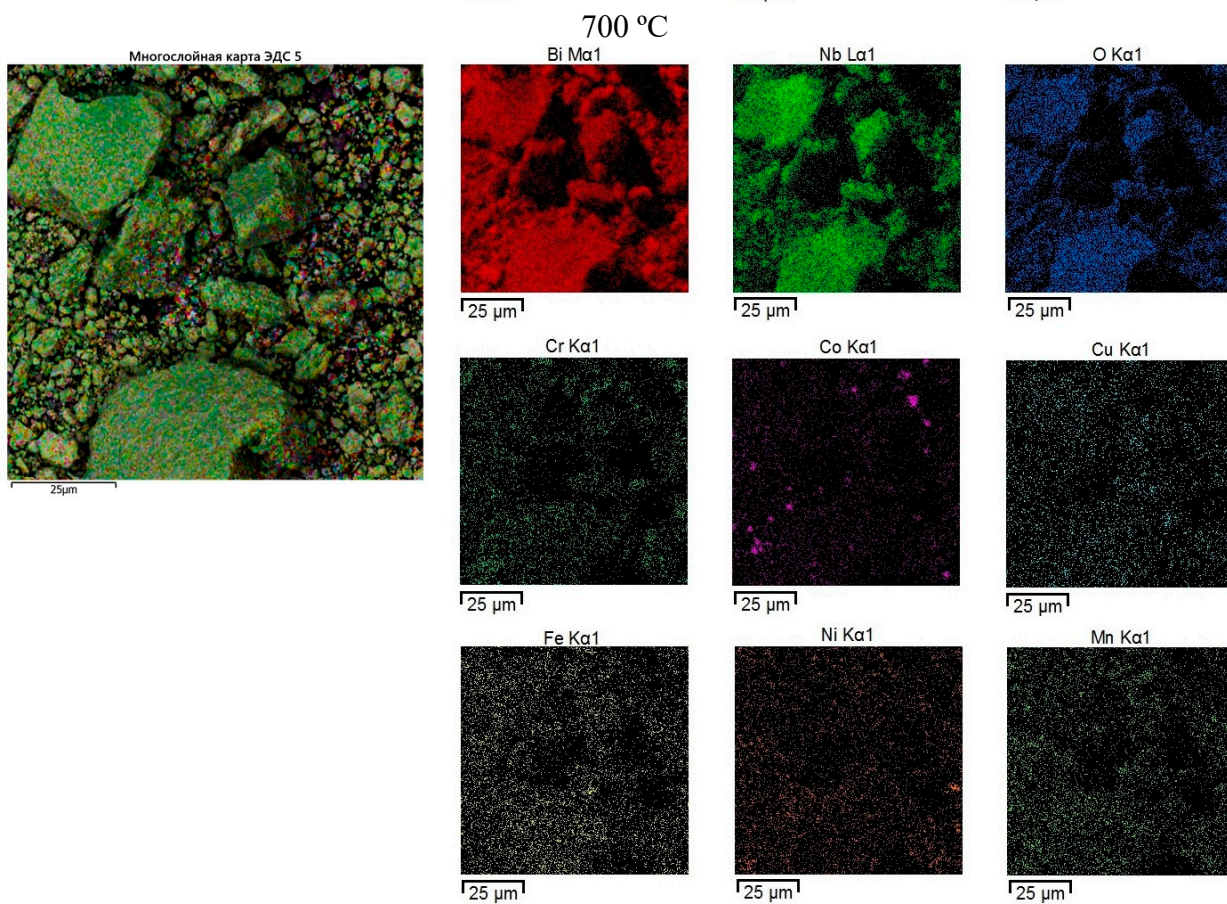



750 °C

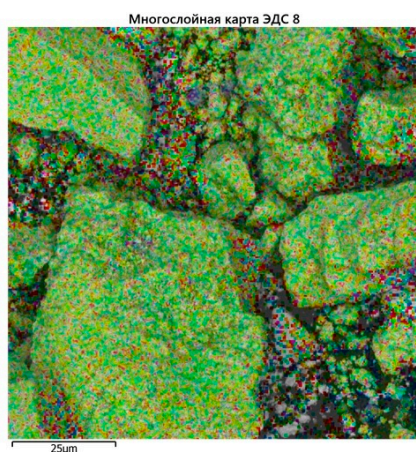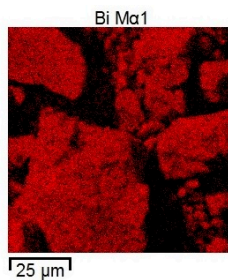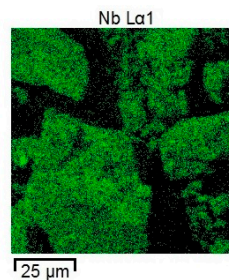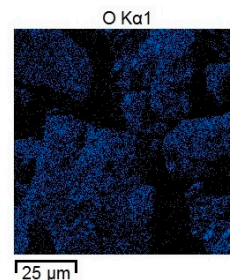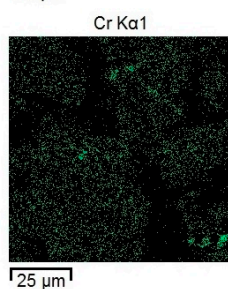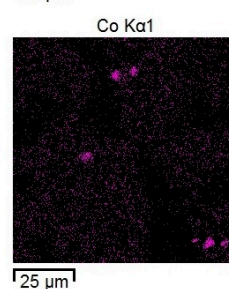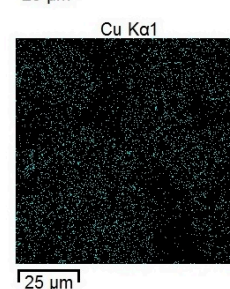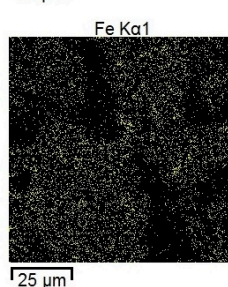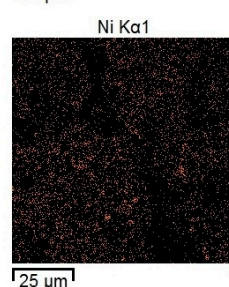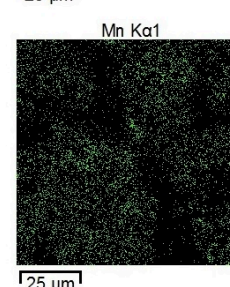

800 °C

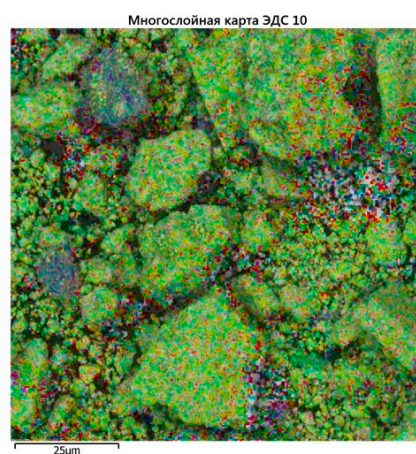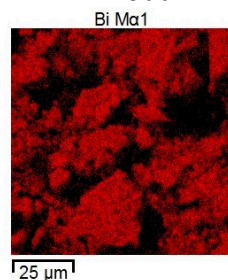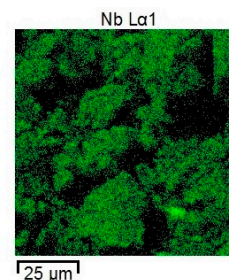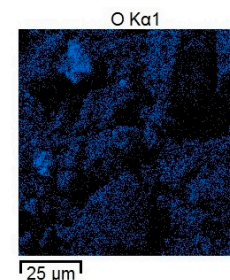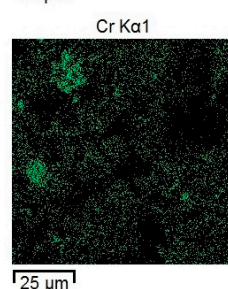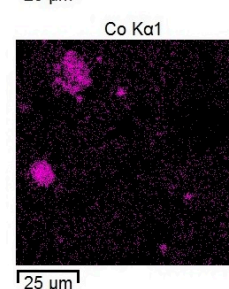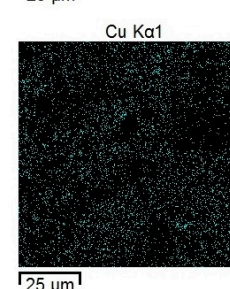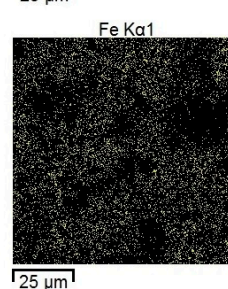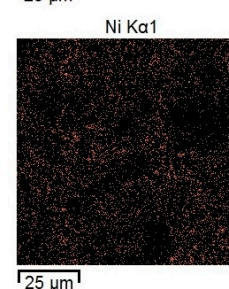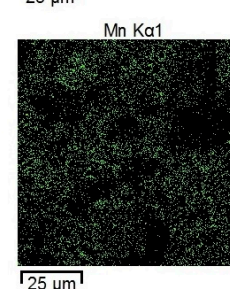

850 °C



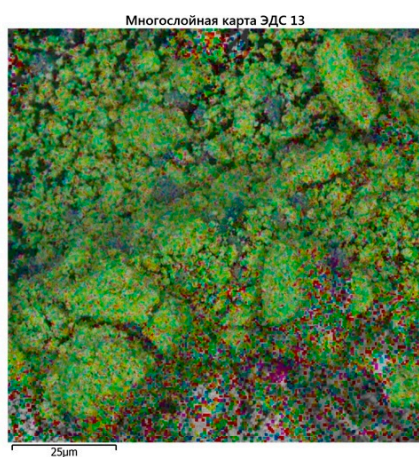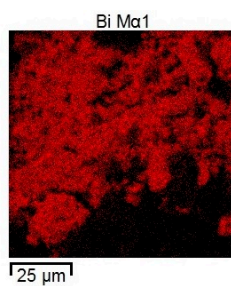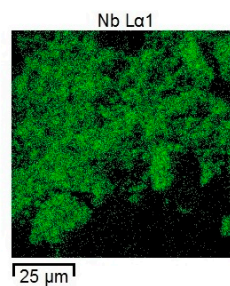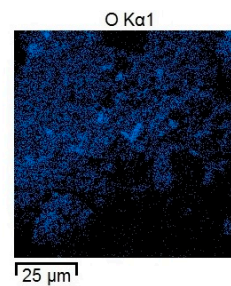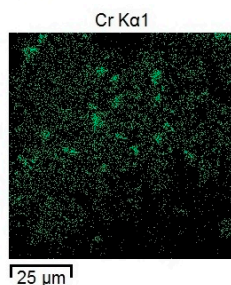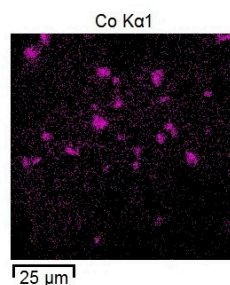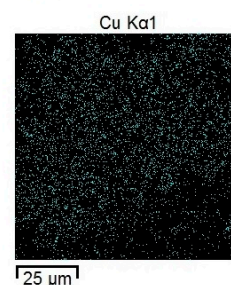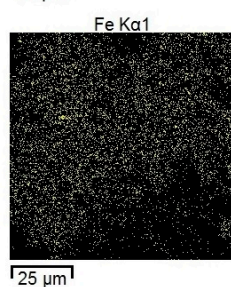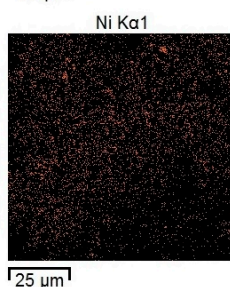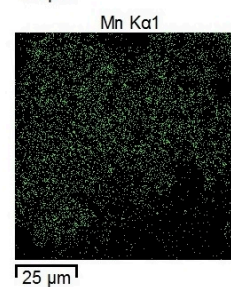

900 °C

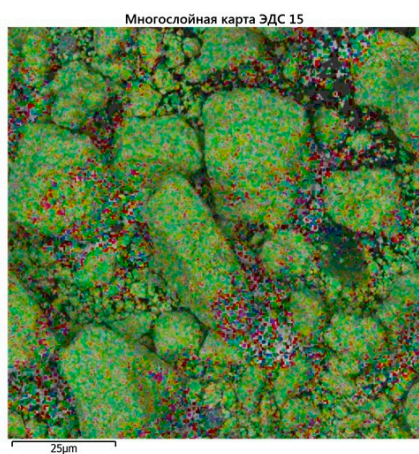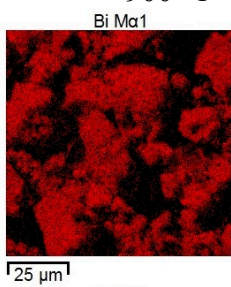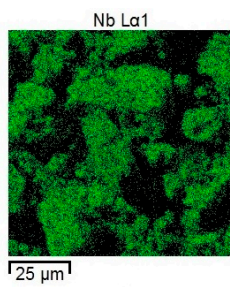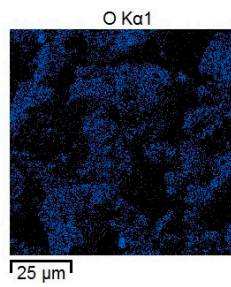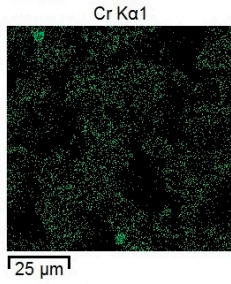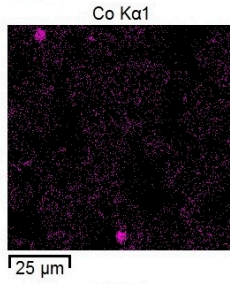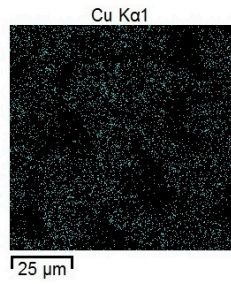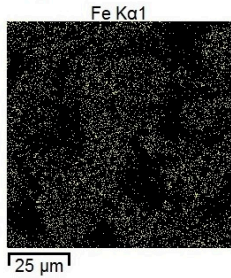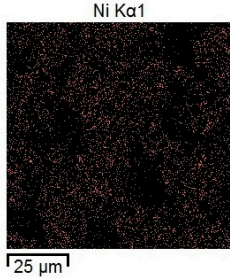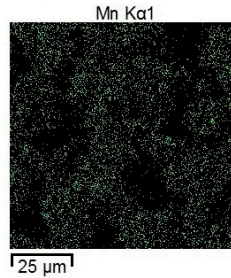

950 °C



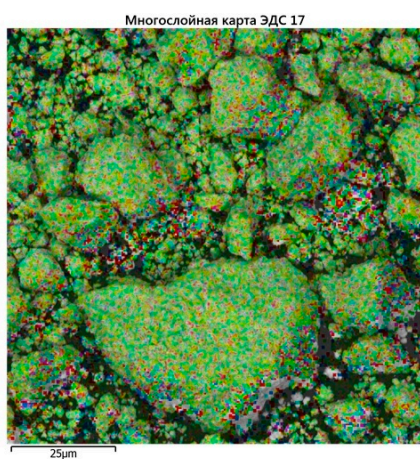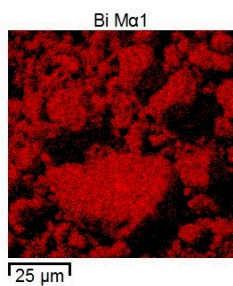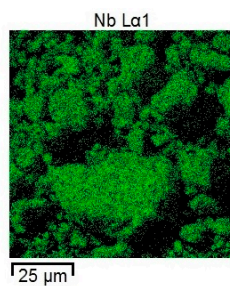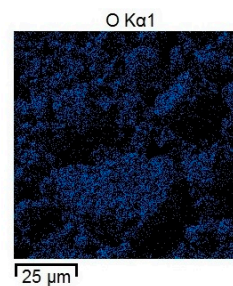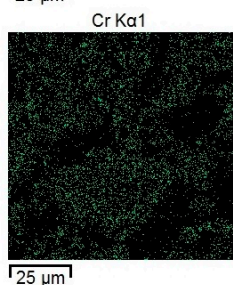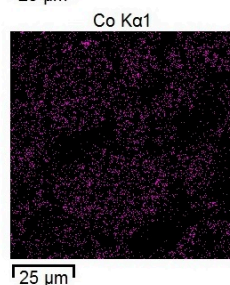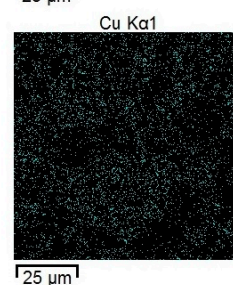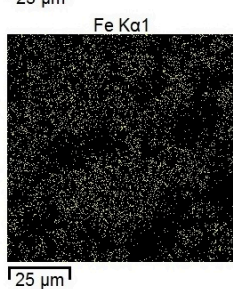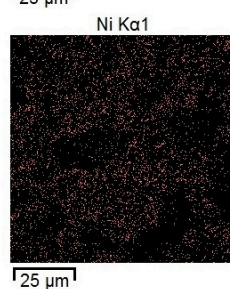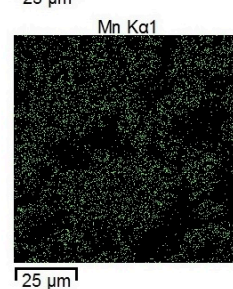

1000 °C

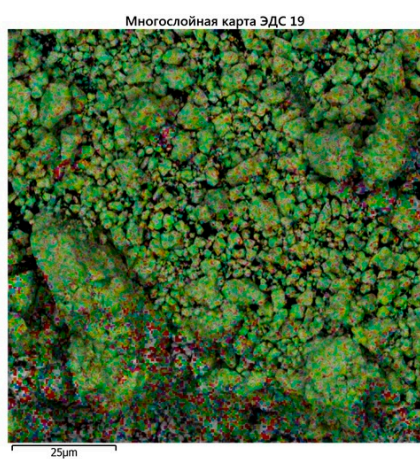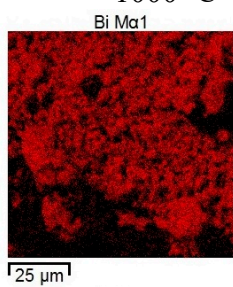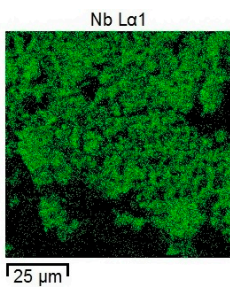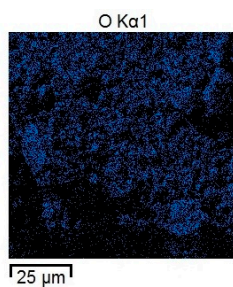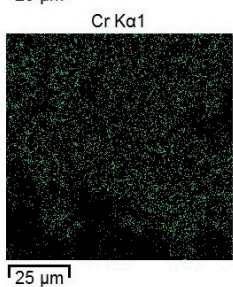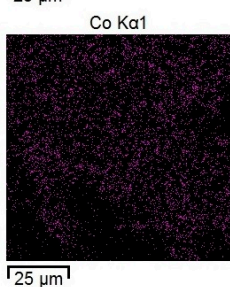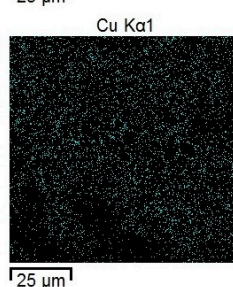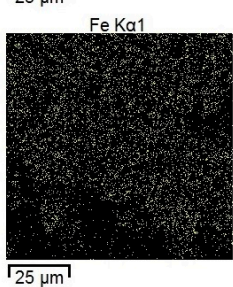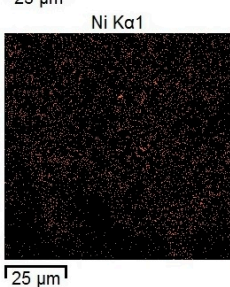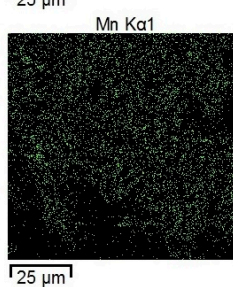

1050 °C



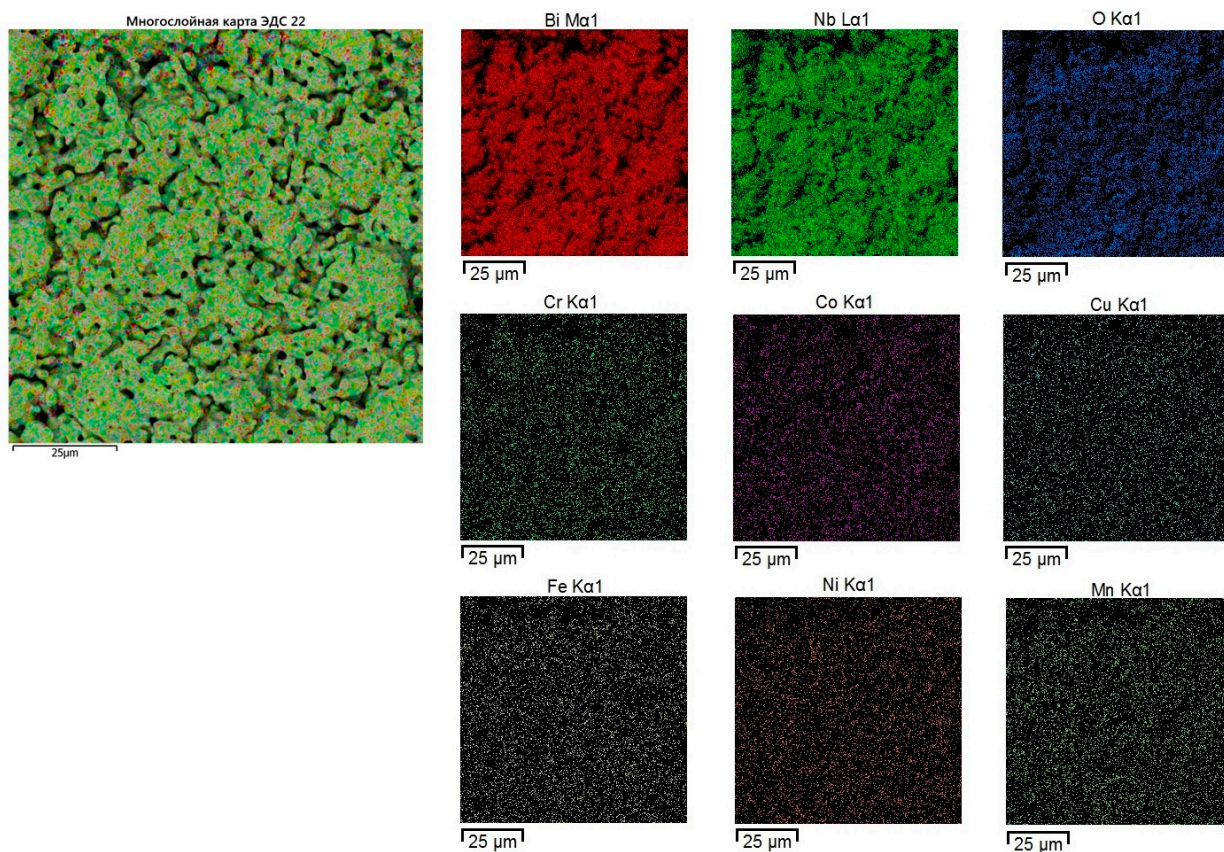

**Fig.S2** EDS elemental mapping of the  $\text{Bi}_2\text{Cr}_{1/6}\text{Mn}_{1/6}\text{Fe}_{1/6}\text{Co}_{1/6}\text{Ni}_{1/6}\text{Cu}_{1/6}\text{Nb}_2\text{O}_{9+\Delta}$  samples, synthesized at temperatures from 650 to 1050 °C

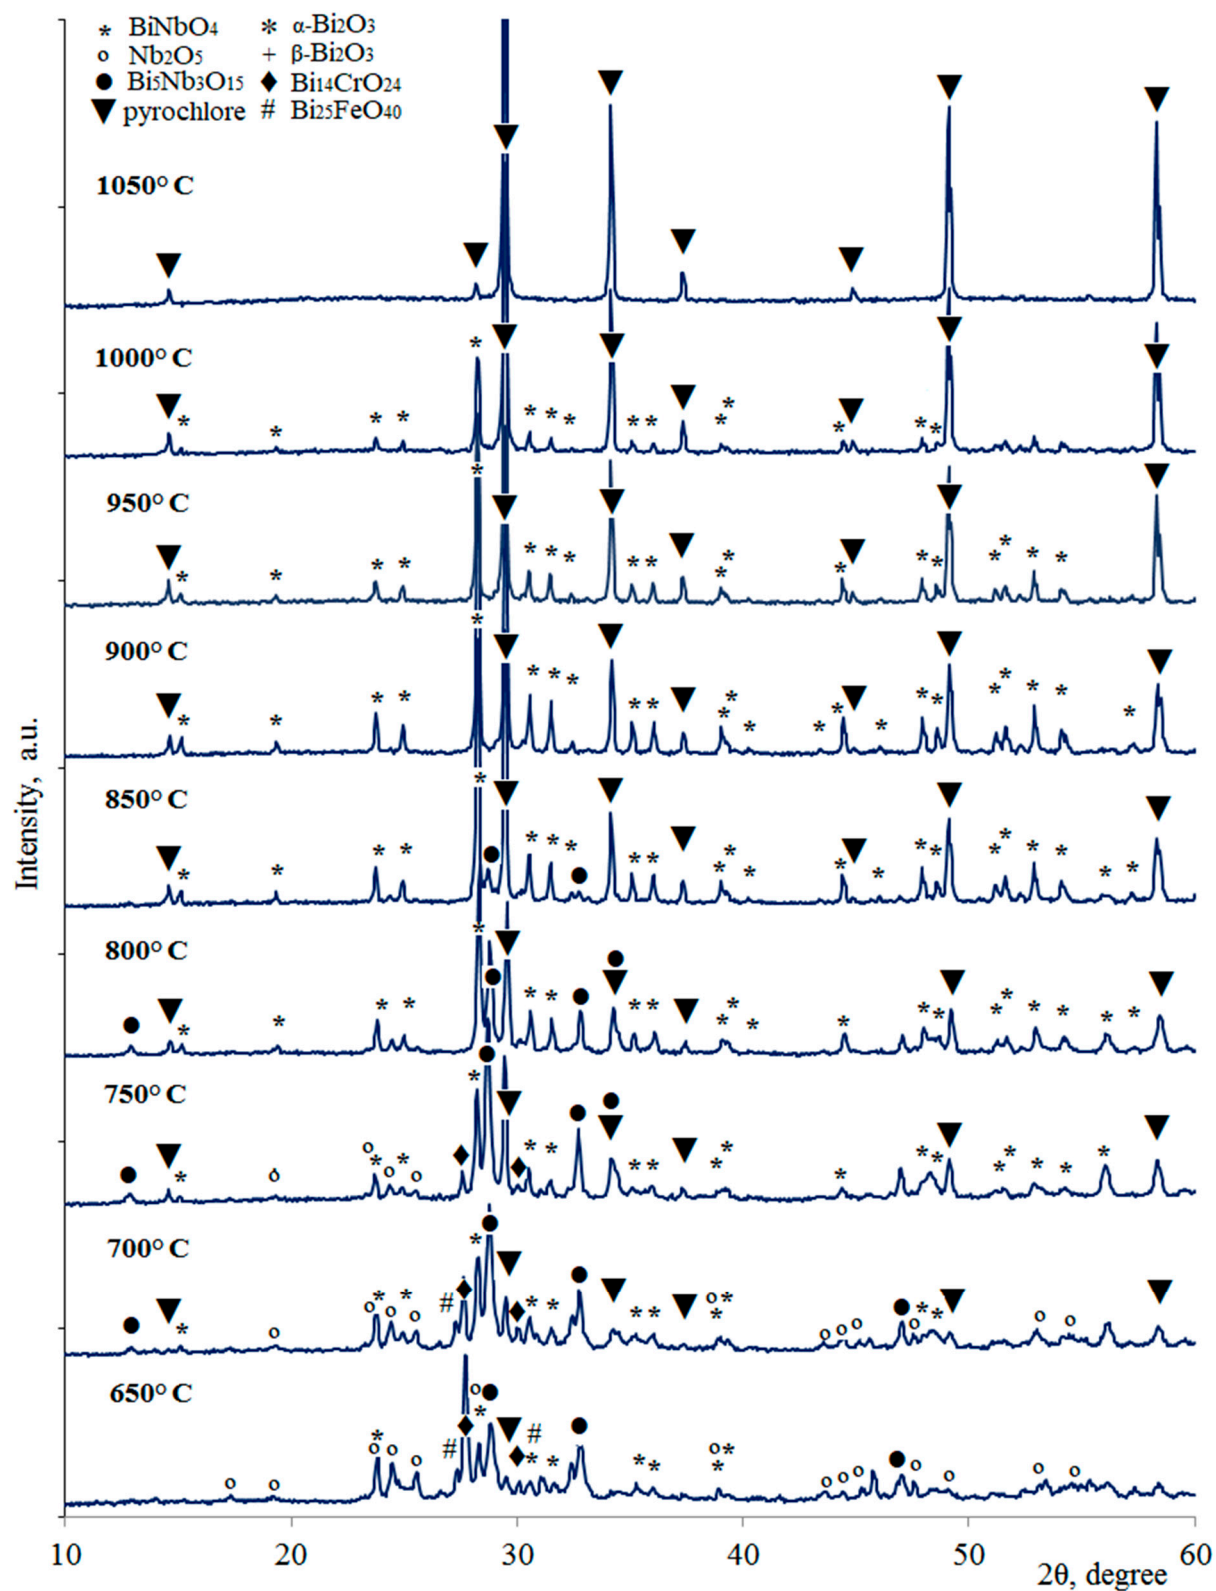

**Fig. S3** X-ray powder diffraction patterns of the  $\text{Bi}_2\text{Cr}_{1/6}\text{Mn}_{1/6}\text{Fe}_{1/6}\text{Co}_{1/6}\text{Ni}_{1/6}\text{Cu}_{1/6}\text{Nb}_2\text{O}_{9+\Delta}$  sample, calcined from 650 to 1050 °C (15 h).
